# Supplementary material for: Temporal dynamics of bacterial communities and predicted nitrogen metabolism genes in a full-scale wastewater treatment plant
Source: Royal Society of Chemistry journal article supplement (doi:10.1039/c7ra10704h), 2017-01-01
Supplement: c7ra10704h1.pdf [file c7ra10704h1.pdf]

## Supplementary Material

### **Temporal dynamics of bacterial communities and predicted nitrogen metabolism genes in a full-scale wastewater treatment plant**

Xiao-Yan Fan, Jing-Feng Gao \*, Kai-Ling Pan, Ding-Chang Li, Hui-Hui Dai, Xing Li

*National Engineering Laboratory for Advanced Municipal Wastewater Treatment and  
Reuse Technology, Beijing University of Technology, Beijing 100124, China*

\*Corresponding author: Dr. Jingfeng Gao, E-mail: [gao.jingfeng@bjut.edu.cn](mailto:gao.jingfeng@bjut.edu.cn) or  
[gao158@gmail.com](mailto:gao158@gmail.com), Tel.: 0086-10-67391918; Fax: 0086-10-67391983.

Tel: +86-10-6739-2627(office); Fax: +86-10-6739-1983

E-mail: [gao.jingfeng@bjut.edu.cn](mailto:gao.jingfeng@bjut.edu.cn) or [gao158@gmail.com](mailto:gao158@gmail.com)

## **Contents**

### **1. Tables**

**Table S1** Detailed information concerning variation of water quality indexes (WQI), operational parameters (OP) and temperature (T) during sampling period.

**Table S2** Primers, thermal programs and standard curves of qPCR in this study.

**Table S3** The KOs of nitrogen cycle.

**Table S4** Raw and effective reads, plus numbers of OTUs, Good's coverage, Shannon, Chao1, ACE, and Simpson of the five Groups.

### **2. Figures**

**Fig. S1** Bacterial community difference across 12 activated sludge samples collected from different seasons as revealed by cluster analysis.

**Fig. S2** Shifts in bacterial functions as revealed by PCoA.

**Fig. S3** Relative abundance of different bacterial functions across 12 activated sludge samples.

**Fig. S4** Top 35 potential functions of the microbes in different Groups.

**Table S1** Detailed information concerning variation of water quality index (WQI), operational parameters (OP) and temperature (T) during sampling period.

| Samples ID | Influent(mg/L) |     |                                 | Effluent(mg/L) |      |                                 | MLSS (mg/L) | SRT (d) | HRT (h) | T (°C) | DO (mg/L) |
|------------|----------------|-----|---------------------------------|----------------|------|---------------------------------|-------------|---------|---------|--------|-----------|
|            | BOD            | COD | NH <sub>4</sub> <sup>+</sup> -N | BOD            | COD  | NH <sub>4</sub> <sup>+</sup> -N |             |         |         |        |           |
| YF.1       | 45             | 91  | 12                              | 1.4            | 4.3  | 0.1                             | 3925        | 15      | 10.1    | 13.5   | 0.3       |
| YF.2       | 66             | 104 | 16                              | 1.6            | 11.5 | 0.1                             | 3441        | 16.5    | 10      | 13     | 0.3       |
| YF.3       | 47             | 89  | 14                              | 2.4            | 10.8 | 0.2                             | 4480        | 15.3    | 11      | 15     | 0.5       |
| YF.4       | 62             | 97  | 14                              | 1.4            | 15.9 | 0.2                             | 4886        | 15.5    | 10      | 17.5   | 0.2       |
| YF.5       | 43             | 81  | 18                              | 2.6            | 8.7  | 0.1                             | 3236        | 15.3    | 10.5    | 21.6   | 0.4       |
| YF.6       | 40             | 73  | 21                              | 1.5            | 11.5 | 0.2                             | 3152        | 15.6    | 10.5    | 23.8   | 0.3       |
| YF.7       | 71             | 103 | 15                              | 1.2            | 5.4  | 0.1                             | 4194        | 15      | 10.7    | 26     | 0.5       |
| YF.8       | 78             | 152 | 24                              | 2.1            | 10.6 | 0.1                             | 5293        | 15      | 10      | 25.5   | 0.5       |
| YF.9       | 42             | 65  | 18                              | 1.4            | 16.1 | 0.1                             | 2829        | 15.4    | 10.2    | 23.5   | 0.3       |
| YF.10      | 69             | 100 | 25                              | 1.2            | 17.9 | 0.9                             | 3634        | 15.5    | 10      | 20     | 0.2       |
| YF.11      | 56             | 80  | 33                              | 3.2            | 19.5 | 0.1                             | 2877        | 15.5    | 10.1    | 17.5   | 0.3       |
| YF.12      | 150            | 264 | 51                              | 3.2            | 25.7 | 0.2                             | 4318        | 15.3    | 10.5    | 14     | 0.3       |

Abbreviations: MLSS: mixed liquor suspended solids; SRT: sludge retention time; HRT: hydraulic retention Time; T: Temperature; DO: dissolved oxygen.

**Table S2** Primers, thermal programs and standard curves of qPCR in this study.

| Target prokaryote                            | Target gene | Sequence (5'-3') of primer pairs                                                                     | Thermal program                                                           | Linear range of standard curves (copies $\mu\text{l}^{-1}$ ) | $R^2$ | Efficiency (%) | Reference |
|----------------------------------------------|-------------|------------------------------------------------------------------------------------------------------|---------------------------------------------------------------------------|--------------------------------------------------------------|-------|----------------|-----------|
| Total bacteria                               | 16S rRNA    | <b>Uni1055F:</b> ATGGCTGTCGTCAGCT<br><b>1392R:</b> ACGGGCGGTGTGTAC                                   | 10 min at 95°C, 40 cycles of 45 s at 95°C, 30 s at 53°C, and 30 s at 72°C | 1.38 $\times$ (10 <sup>2</sup> -10 <sup>9</sup> )            | 0.998 | 90.0%          | 1         |
| Total archaea                                | 16S rRNA    | <b>934f:</b> GAATTGGCGGGGAGCAC<br><b>1040r:</b> GGCCATGCACCWCCTCTC                                   | 10 min at 95°C, 40 cycles of 45 s at 95°C, 30 s at 59°C, and 30 s at 72°C | 1.65 $\times$ (10 <sup>2</sup> -10 <sup>9</sup> )            | 0.998 | 107.7%         | 2         |
| AOA                                          | <i>amoA</i> | <b>Arch-amoA26F:</b> GACTACATMTTCTAYACWGAYTGGGC<br><b>Arch-amo417R:</b> GGKGTCA TRTATGGWGGYAAAYGTTGG | 10 min at 95°C, 40 cycles of 45 s at 95°C, 30 s at 56°C, and 45 s at 72°C | 2.88 $\times$ (10 <sup>2</sup> -10 <sup>9</sup> )            | 0.999 | 90.5%          | 3         |
| AOB                                          | <i>amoA</i> | <b>amoA-1F:</b> GGGGTTTCTACTGGTGGT<br><b>amoA-2R:</b> CCCCTCKGSAAAGCCTTCTTC                          | 10 min at 95°C, 40 cycles of 45 s at 95°C, 30 s at 58°C, and 30 s at 72°C | 3.25 $\times$ (10 <sup>1</sup> -10 <sup>8</sup> )            | 0.996 | 99.2%          | 4         |
| Comammox ( <i>Ca. Nitrospira inopinata</i> ) | <i>amoA</i> | <b>Nino_amoA_19F:</b> ATAATCAAAGCCGCCAAGTTGC<br><b>Nino_amoA_252R:</b> AACGGCTGACGATAATTGACC         | 10 min at 95°C, 40 cycles of 45 s at 95°C, 30 s at 60°C, and 30 s at 72°C | 6.87 $\times$ (10 <sup>1</sup> -10 <sup>8</sup> )            | 0.999 | 92.1%          | 5         |
| <i>Nitrospira</i>                            | 16S rRNA    | <b>Nsr1113F:</b> CCTGCTTTCAGTTGCTACCG<br><b>Nsr1264R:</b> GTTTGCAGCGCTTTGTACCG                       | 10 min at 95°C, 40 cycles of 45 s at 95°C, 30s at 65°C, and 30 s at 72°C  | 5.72 $\times$ (10 <sup>1</sup> -10 <sup>8</sup> )            | 0.998 | 95.0%          | 6         |
| Denitrifying bacteria                        | <i>nirS</i> | <b>nirSCd3aFm:</b> AACGYSAAGGARACSGG<br><b>nirSR3cdm:</b> GASTTCGGRTGSGTCTTSAYGAA                    | 10 min at 95°C, 40 cycles of 45 s at 95°C, 30 s at 60°C, and 30 s at 72°C | 1.48 $\times$ (10 <sup>1</sup> -10 <sup>8</sup> )            | 0.994 | 112.0%         | 7         |
| Denitrifying bacteria                        | <i>nirK</i> | <b>nirK876:</b> ATYGGCGVCA YGGCGA<br><b>nirK1040:</b> GCCTCGATCAGRTTRTGTT                            | 10 min at 95°C, 40 cycles of 45 s at 95°C, 30 s at 60°C, and 30 s at 72°C | 5.13 $\times$ (10 <sup>1</sup> -10 <sup>8</sup> )            | 0.996 | 96.0%          | 8         |

**Table S3** The KOs of nitrogen cycle

| <b>KOs</b>                             | <b>Genes</b>                                                                        |
|----------------------------------------|-------------------------------------------------------------------------------------|
| <b>Nitrogen fixation</b>               |                                                                                     |
| K02588                                 | <i>nifH</i> ; nitrogenase iron protein NifH                                         |
| K02586                                 | <i>nifD</i> ; nitrogenase molybdenum-iron protein alpha chain                       |
| K02591                                 | <i>nifK</i> ; nitrogenase molybdenum-iron protein beta chain                        |
| K00531                                 | <i>anfG</i> ; nitrogenase delta subunit                                             |
| <b>Assimilatory nitrate reduction</b>  |                                                                                     |
| K00367                                 | <i>narB</i> ; ferredoxin-nitrate reductase                                          |
| K10534                                 | <i>NR(NAR)</i> ; nitrate reductase (NAD(P)H)                                        |
| K00372                                 | <i>nasA</i> ; assimilatory nitrate reductase catalytic subunit                      |
| K00360                                 | <i>nasB</i> ; assimilatory nitrate reductase electron transfer subunit              |
| K00366                                 | <i>nirA</i> ; ferredoxin-nitrite reductase                                          |
| K17877                                 | <i>NIT-6</i> ; nitrite reductase (NAD(P)H)                                          |
| <b>Dissimilatory nitrate reduction</b> |                                                                                     |
| K00362                                 | <i>nirB</i> ; nitrite reductase (NADH) large subunit                                |
| K00363                                 | <i>nirD</i> ; nitrite reductase (NADH) small subunit                                |
| K03385                                 | <i>nrfA</i> ; nitrite reductase (cytochrome c-552)                                  |
| K00374*                                | <i>narI, narV</i> ; nitrate reductase gamma subunit                                 |
| K15876                                 | <i>nrfH</i> ; cytochrome c nitrite reductase small subunit                          |
| <b>Denitrification</b>                 |                                                                                     |
| K00370*                                | <i>narG, narZ, nxrA</i> ; nitrate reductase / nitrite oxidoreductase, alpha subunit |
| K00371*                                | <i>narH, narY, nxrB</i> ; nitrate reductase / nitrite oxidoreductase, beta subunit  |
| K02567*                                | <i>napA</i> ; periplasmic nitrate reductase NapA                                    |
| K02568*                                | <i>napB</i> ; cytochrome c-type protein NapB                                        |
| K00368                                 | <i>nirK</i> ; nitrite reductase (NO-forming)                                        |
| K15864                                 | <i>nirS</i> ; nitrite reductase (NO-forming) / hydroxylamine reductase              |
| K04561                                 | <i>norB</i> ; nitric oxide reductase subunit B                                      |
| K02305                                 | <i>norC</i> ; nitric oxide reductase subunit C                                      |
| K15877                                 | <i>CYP55</i> ; fungal nitric oxide reductase                                        |
| K00376                                 | <i>nosZ</i> ; nitrous-oxide reductase                                               |
| <b>Nitrification</b>                   |                                                                                     |
| K10944                                 | <i>pmoA-amoA</i> ; methane/ammonia monooxygenase subunit A                          |
| K10945                                 | <i>pmoB-amoB</i> ; methane/ammonia monooxygenase subunit B                          |
| K10946                                 | <i>pmoC-amoC</i> ; methane/ammonia monooxygenase subunit C                          |
| K10535                                 | <i>hao</i> (hydroxylamine dehydrogenase)                                            |

Asterisks (\*) indicate KOs that are classified under both the dissimilatory nitrate reduction and denitrification category in the KEGG database, but K00374 were classified as dissimilatory nitrate reduction, and the other four KOs (K00370, K00371, K02567 and K02568) were classified as denitrification for all the analyses herein.

**Table S4** Raw and effective reads, plus numbers of OTUs, Good's coverage, Shannon, Chao1, ACE, and Simpson of the five Groups

| Group     | Sequences                         |                   |                     |                                     | 3% cut off       |      |                |         |         |         |         |
|-----------|-----------------------------------|-------------------|---------------------|-------------------------------------|------------------|------|----------------|---------|---------|---------|---------|
|           | Sample ID                         | Trimmed sequences | Effective sequences | Effective sequences proportion/ (%) | Sequence numbers | OTUs | Good coverages | ACE     | Chao1   | Shannon | Simpson |
| Group I   | YF.9                              | 41724             | 39233               | 94.03                               | 28230            | 1563 | 96.44%         | 1799.31 | 1812.86 | 5.53    | 0.025   |
| Group II  | YF.11                             | 33157             | 29308               | 88.39                               | 28230            | 798  | 98.16%         | 959.62  | 987.42  | 4.88    | 0.021   |
| Group III | YF.2                              | 37445             | 35234               | 94.10                               | 28230            | 1557 | 96.40%         | 1831.68 | 1845.41 | 5.77    | 0.012   |
| Group IV  | YF.1,<br>YF.3,<br>YF.4,<br>YF.5,  | 36543±            | 34403±              | 94.11±1.05                          | 28230            | 1650 | 96.24%         | 1889.26 | 1919.39 | 6.01±   | 0.007   |
|           | YF.6,<br>YF.8,<br>YF.10,<br>YF.12 | 4572              | 4431                |                                     |                  | ±58  | ±0.20%         | ±64.79  | ±71.40  | 0.11    | ±0.001  |
| Group V   | YF.7                              | 35236             | 33331               | 94.59                               | 28230            | 1600 | 96.26%         | 1873.87 | 1906.51 | 5.82    | 0.010   |

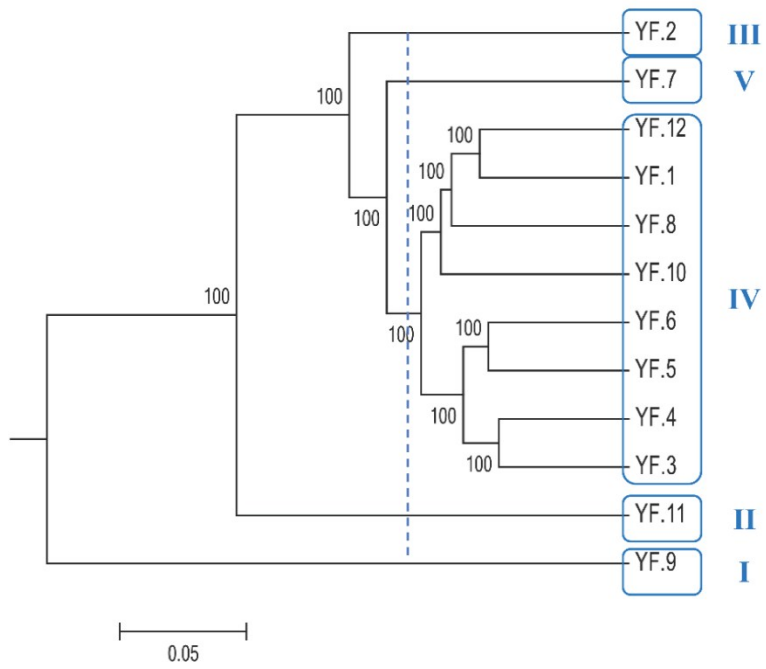

**Fig. S1** Bacterial community difference across 12 activated sludge samples collected from different seasons as revealed by cluster analysis.

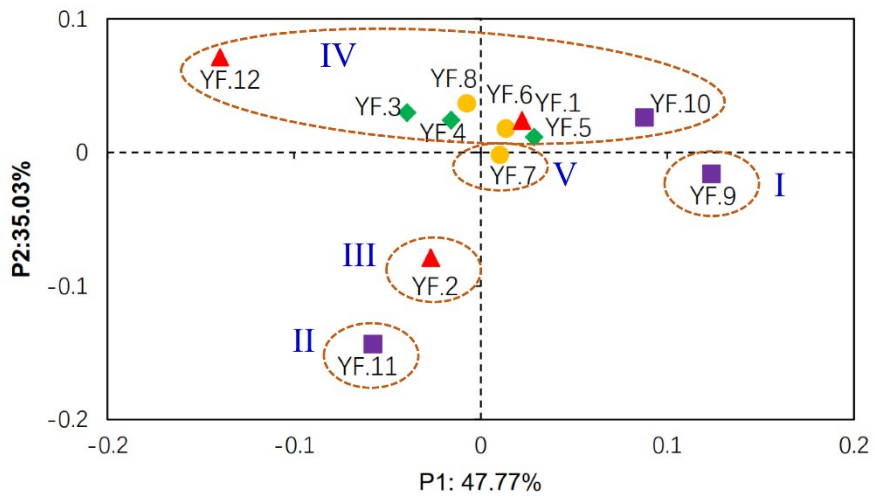

**Fig. S2** Shifts in bacterial functions as revealed by PCoA.



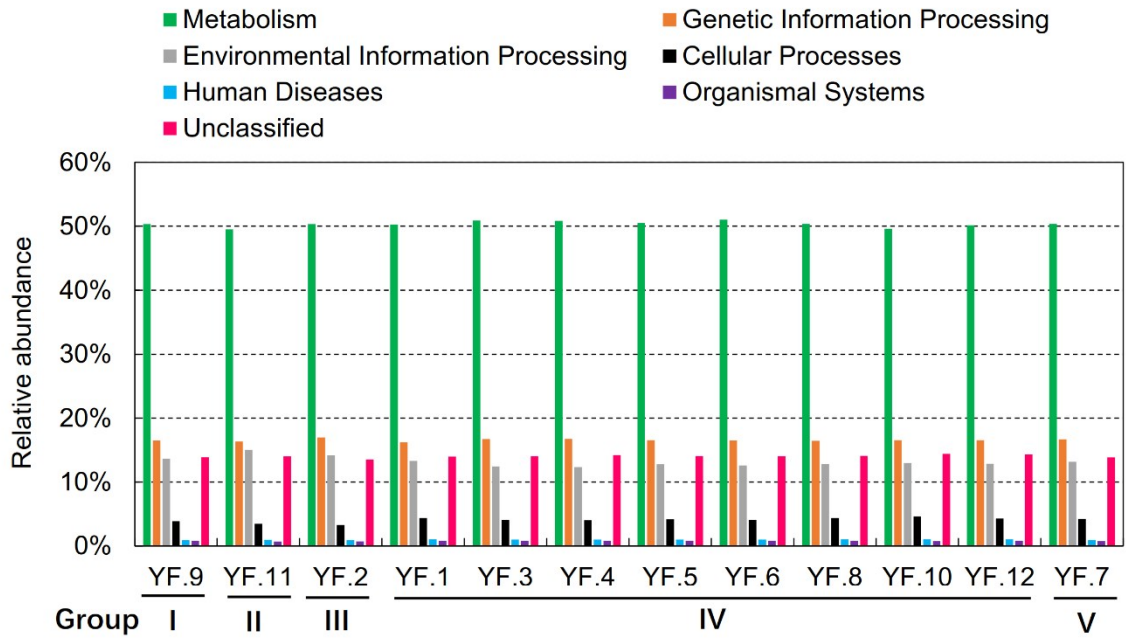

**Fig. S3** Relative abundance of different bacterial functions across 12 activated sludge samples.

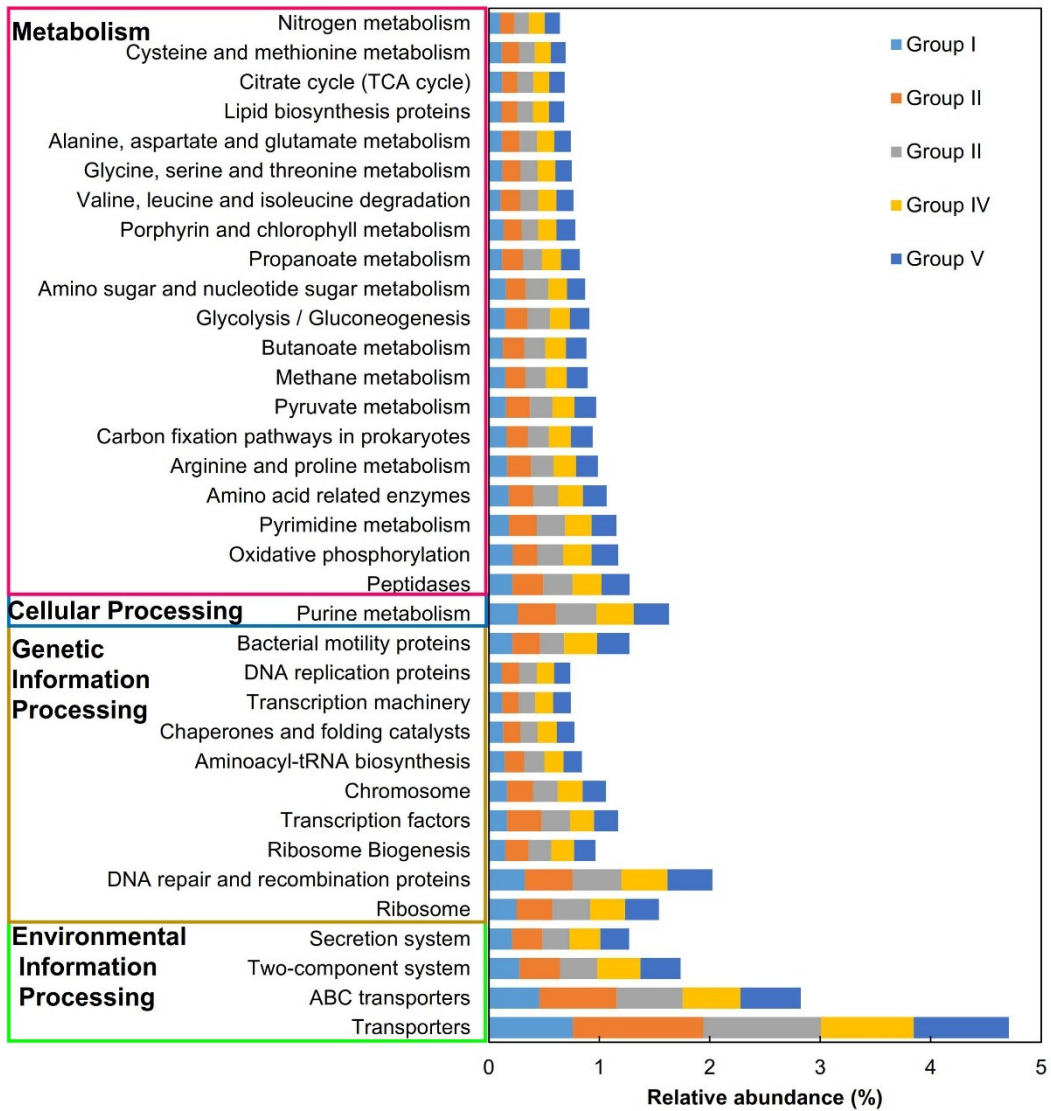

Fig. S4 Top 35 potential functions of the microbes in different Groups.

## References:

1. M. J. Ferris, G. Muyzer and D. M. Ward, *Appl. Environ. Microbiol.*, 1996, **62**, 340-346.
2. G. C. Baker, J. J. Smith and D. A. Cowan, *J. Microbiol. Methods*, 2003, **55**, 541-555.
3. C. A. Francis, K. J. Roberts, J. M. Beman, A. E. Santoro and B. B. Oakley, *Proc. Natl. Acad. Sci.*, 2005, **102**, 14683-14688.
4. U. Purkhold, A. Pommerening-Roser, S. Juretschko, M. C. Schmid, H. Koops and M. Wagner, *Appl. Environ. Microbiol.*, 2000, **66**, 5368-5382.
5. H. Daims, E. V. Lebedeva, P. Pjevac, P. Han, C. Herbold, M. Albertsen, N. Jehmlich, M. Palatinszky, J. Vierheilig, A. Bulaev, R. H. Kirkegaard, M. von Bergen, T. Rattei, B. Bendinger, P. H. Nielsen and M. Wagner, *Nature*, 2015, **528**, 504-509.
6. H. M. Dionisi, A. C. Layton, G. Harms, I. R. Gregory, K. G. Robinson and G. S. Sayler, *Appl. Environ. Microbiol.*, 2002, **68**, 245-253.
7. S. Henry, E. Baudoin, J. C. Lopez-Gutierrez, F. Martin-Laurent, A. Brauman and L. Philippot, *J. Microbiol. Methods*, 2004, **59**, 327-335.
8. E. Kandeler, K. Deiglmayr, D. Tscherko, D. Bru and L. Philippot, *Appl. Environ. Microbiol.*, 2006, **72**, 5957-5962.
